# Supplementary material for: Complex formation constant of ferric ion with Gly, Pro-Hyp and Gly-Pro-Hyp
Source: Royal Society of Chemistry journal article supplement (doi:10.1039/c8ra04763d), 2018-01-01

**Fig. S1.** Titration curves of Gly and Gly-Pro-Hyp with iron (III) at  $I=0.15 \text{ mol}\cdot\text{dm}^{-3}$  NaCl and 25 °C, 37 °C and 40°C. The (a), (b) and (c) are the titration curves of Gly at temperature of 25 °C, 37 °C and 40°C. (d), (e) and (f) are the titration curves of Gly-Pro-Hyp at temperature of 25 °C, 37 °C and 40°C. Carbonate-free NaOH ( $0.1 \text{ mol}\cdot\text{dm}^{-3}$ ) was used to titrated solutions (A):  $3\times 10^{-3} \text{ mol}\cdot\text{dm}^{-3}$  HCl+ $0.15 \text{ mol}\cdot\text{dm}^{-3}$  NaCl; (B) $3\times 10^{-3} \text{ mol}\cdot\text{dm}^{-3}$  HCl+ $0.15 \text{ mol}\cdot\text{dm}^{-3}$  NaCl + $3\times 10^{-3} \text{ mmol}\cdot\text{dm}^{-3}$  ligands (Gly, Pro-Hyp or Gly-Pro-Hyp); and (C) $3\times 10^{-3} \text{ mol}\cdot\text{dm}^{-3}$  HCl+ $0.15 \text{ mol}\cdot\text{dm}^{-3}$  NaCl +  $3\times 10^{-3} \text{ mmol}\cdot\text{dm}^{-3}$  ligands (Gly, Pro-Hyp or Gly-Pro-Hyp) +  $3\times 10^{-3}$  (C<sub>1</sub>),  $1.5\times 10^{-3}$  (C<sub>2</sub>) or  $1\times 10^{-3}$  (C<sub>3</sub>)  $\text{mol}\cdot\text{dm}^{-3}$  ferric ion. And the solution C<sub>1</sub>, C<sub>2</sub> and C<sub>3</sub> has the molar concentration ratio of metal to ligand here were 1:1, 1:2 and 1:3 correspondently.

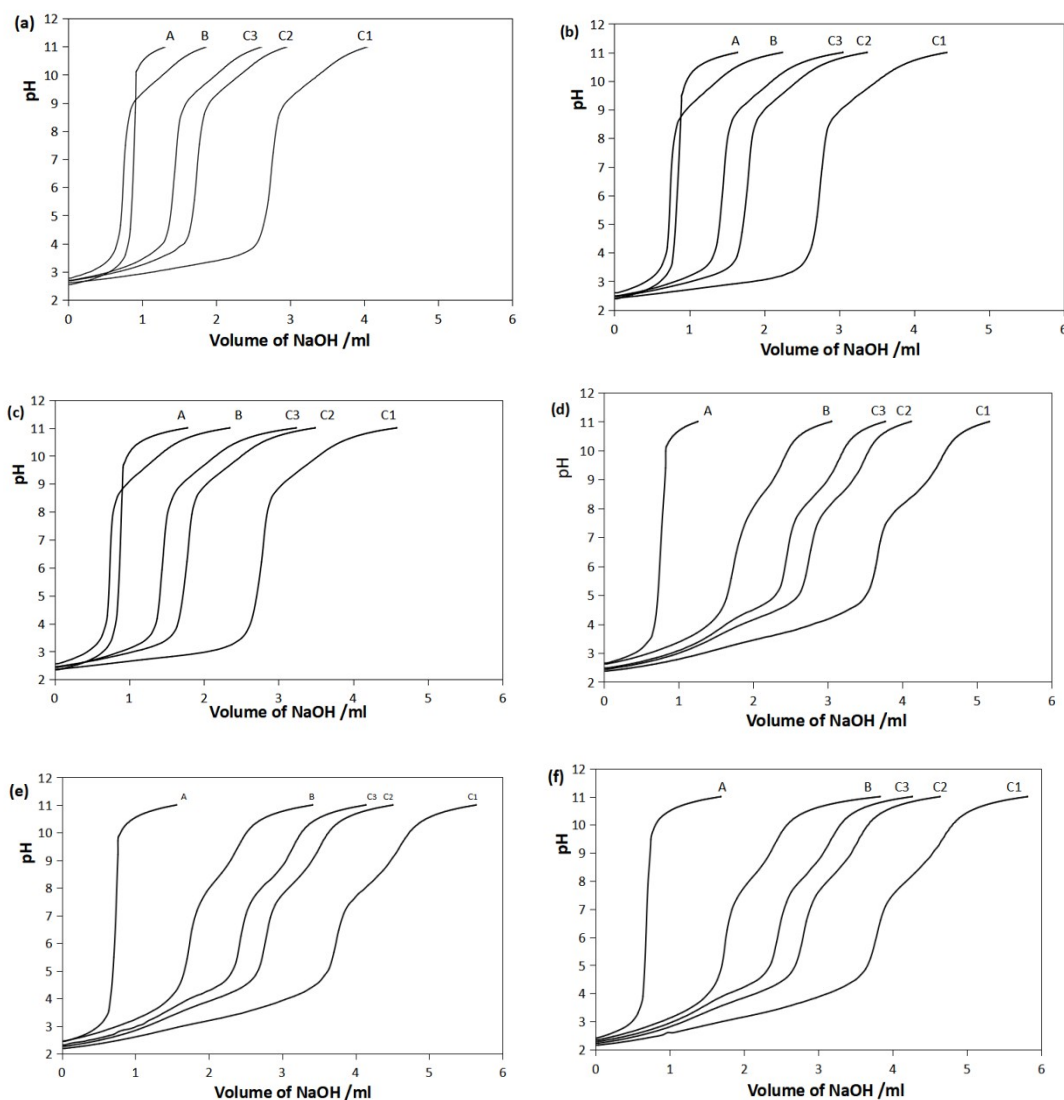

Supplement: c8ra04763d1.pdf [file c8ra04763d1.pdf]
